## Efficacy and safety of percutaneous patent foramen ovale closure in patients with a hypercoagulable disorder

E. Ben-Assa<sup>1</sup>, J. Herrero-Garibi<sup>2</sup>, I. Cruz-Gonzalez<sup>2</sup>, S. Elmariah<sup>1</sup>, R. Al-Bawardy<sup>1</sup>, R. Sakhuja<sup>1</sup>, F.V. Lima<sup>3</sup>, N. Mingming<sup>1</sup>, I. Inglessis<sup>1</sup>, I.F. Palacios<sup>1</sup>

<sup>1</sup>Massachusetts General Hospital - Harvard Medical School, Boston, United States of America; <sup>2</sup>Hospital Clinico Universitario, Salamanca, Spain;

<sup>3</sup>Brown University, Providence, United States of America

**Funding Acknowledgement:** Type of funding source: Public hospital(s). Main funding source(s): Research funds of the Massachusetts general hospital

**Background:** Transcatheter closure of patent foramen ovale (PFO) in patients with cryptogenic stroke reduce the rate of recurrent events. Although presence of thrombophilia increases the risk for paradoxical emboli through a PFO, such patients were excluded from the large randomized studies.

**Purpose:** To examine the effect of hypercoagulable state on clinical outcomes after PFO closure.

**Methods:** We retrospectively analyzed data of 800 consecutive patients undergoing percutaneous PFO closure at the Massachusetts general hospital. We compared the safety and efficacy of the procedure in patients with and without a hypercoagulable state. Periprocedural treatment included 3 months of anticoagulation followed by low dose aspirin.

**Results:** A hypercoagulable disorder was found in 239 patients (29.9%).

There were no significant differences in baseline demographics, echocardiographic characteristics, procedural success rate, or complication rate between both groups. At median follow-up of 41.9 months there were no differences in the rate of stroke/transient ischemic attack (2.5% in non-hypercoagulable group vs. 3.4% in hypercoagulable group, log-rank test  $p=0.349$ ). Survival analysis of composite outcome that included: ischemic neurologic event, reintervention and procedural or neurologic death did not show significant difference between groups (Log-rank  $p=0.122$ ).

**Conclusion:** Percutaneous PFO closure is a safe and effective therapeutic approach for patients with cryptogenic stroke and an underlying hypercoagulable state
